# Supplementary material for: A comparative study of the main constituents and antidepressant effects of raw and vinegar-baked Bupleuri Radix in rats subjected to chronic unpredictable mild stress
Source: Royal Society of Chemistry journal article supplement (doi:10.1039/c7ra04724j), 2017-01-01
Supplement: c7ra04724j1.pdf [file c7ra04724j1.pdf]

**Electronic Supplementary Information (ESI)**

**A comparative study of main constituents and antidepressant effects of raw and vinegar-baked Bupleuri Radix in chronic unpredictable mild stress rats**

Tianli Lei<sup>a</sup>, Yadan Wang<sup>a</sup>, Mingxiao Li<sup>a</sup>, Xin Zhang<sup>a</sup>, Chongning Lv<sup>a</sup>,  
Lingyun Jia<sup>a</sup>, Jing Wang<sup>\*b</sup> and Jincai Lu<sup>\*a</sup>

<sup>a</sup>*Department of Medicinal Plant, School of Traditional Chinese Materia Medica, Shenyang Pharmaceutical University, Shenyang 110016, P.R. China. E-mail: [jincailu@126.com](mailto:jincailu@126.com) Tel./fax: +86 024 23986500.*

<sup>b</sup>*Department of Pharmaceutical Botany, School of Traditional Chinese Materia Medica, Shenyang Pharmaceutical University, Shenyang 110016, P.R. China. E-mail: [wangjingyk@126.com](mailto:wangjingyk@126.com) Tel./fax: +86 024 23986499.*

## Contents

**S1** HPLC-DAD chromatographic conditions.

**S2** The chromatographic separation and MS analysis.

**Table S1** The chronic unpredictable mild stress procedure and BR/VBBR treatment schedule.

**Table S2** UHPLC–QTOF-MS accurate mass measurements for the major constituents BR and VBBR.

**Table S3** <sup>1</sup>H NMR data and assignments of the metabolites in hippocampus and liver.

**Fig. S1** ESI-Q-TOF-MS/MS spectra of saikosaponins acquired in negative ion mode. eg. 4"-O-acetyl-SSa.

**Fig. S2** PLS-DA model validation.

### **S1 HPLC-DAD chromatographic conditions**

The chromatographic separation was carried out on a THERMO ODS-2 HYPERSIL C18 column (250 mm × 4.6 mm, 5 μm) at column temperature of 30°C. The mobile phase was acetonitrile (A) and aqueous solution (B) with a gradient program as follows: 0–15 min: 30% A; 15–30 min: 30–40% A; 30–50 min: 40–45% A; 50–55 min: 45–55% A; 55–70 min: 55–70% A; 70–80 min: 70–30% A at a flow rate of 1 mL/min. The injection volume of sample was 10 μL, and the detection wavelength for quantitative analysis was set at 210 nm based on the scan from 190-400 nm of DAD.

## S2 The chromatographic separation and MS analysis

The main chemical composition of BR and VBBR was analyzed by UHPLC-Q-TOF-MS. Chromatographic separation was achieved on an ACQUITY BEH C<sub>18</sub> column (100×2.1 mm, i.d., 1.7 μm, Waters, Milford, MA, USA). The mobile phase consisting of water (A) and acetonitrile (B) was run at a flow rate of 0.4 mL/min. The UHPLC eluting conditions were optimized as follows: 5% B (0–2 min), 5% to 15% B (2–3 min), 15% to 40% B (3–10 min), 40% to 45% B (10–13 min), 45% to 60% B (13–17 min), 60% to 100% B (17–18 min), 100% B for 1 min, and then returned to initial condition in 1 min. The column temperature was maintained at 35°C. The injection volume was 1 μL. MS analysis was performed by a Waters Xevo G2 QTOF (Waters, Manchester, UK) with the mass conditions as follows: capillary voltage was 3 kV and cone voltage were 35 V in negative ion mode; Collision energy 30 eV; TOF MS were scanned with the mass range of  $m/z$  100 – 1500; Desolvation gas was set to 600.0 L/h at temperature of 300°C; Cone gas was set to 50.0 L/h, and source temperature was set to 100°C.

**Table S1** The chronic unpredictable mild stress (CUMS) procedure and BR/VBRR treatment schedule.

| <b>Day</b> | <b>Stressor</b>                                          | <b>Drug treatment</b> |
|------------|----------------------------------------------------------|-----------------------|
| 1          | Food deprivation (24 h)                                  | No treatment          |
| 2          | Water deprivation (23 h)/empty water bottles (1 h)       | No treatment          |
| 3          | Physical restraint (activity restriction in bottle, 4 h) | No treatment          |
| 4          | White noises (24 h)                                      | No treatment          |
| 5          | Tail pinch (1 cm apart from the tail, 5 min)             | No treatment          |
| 6          | Cold water swimming (15°C, 5 min)                        | No treatment          |
| 7          | Wet bedding (24 h)                                       | No treatment          |
| 8          | Day/night inversion (24 h)                               | No treatment          |
| 9          | Cold water swimming (15°C, 5 min)                        | No treatment          |
| 10         | Water deprivation (23 h)/Empty water bottles (1 h)       | No treatment          |
| 11         | White noise (24 h)                                       | No treatment          |
| 12         | Physical restraint (activity restriction in bottle, 4 h) | No treatment          |
| 13         | Tail pinch (1 cm apart from the tail, 5 min)             | No treatment          |
| 14         | Food deprivation (24 h)                                  | No treatment          |
| 15         | Cold water swimming (15°C, 5 min)                        | No treatment          |
| 16         | Wet bedding (24 h)                                       | No treatment          |
| 17         | Water deprivation (23 h)/Empty water bottles (1 h)       | No treatment          |
| 18         | Day/night inversion (24 h)                               | No treatment          |
| 19         | Food deprivation (24 h)                                  | No treatment          |
| 20         | Cold water swimming (15°C, 5 min)                        | No treatment          |
| 21         | Physical restraint (activity restriction in bottle, 4 h) | No treatment          |
| 22         | White noises (24 h)                                      | treatment             |
| 23         | Tail pinch (1 cm apart from the tail, 5 min)             | treatment             |
| 24         | Wet bedding (24 h)                                       | treatment             |
| 25         | Water deprivation (23 h)/Empty water bottles (1 h)       | treatment             |

---

|    |                                                          |           |
|----|----------------------------------------------------------|-----------|
| 26 | Day/night inversion (24 h)                               | treatment |
| 27 | Tail pinch (1 cm apart from the tail, 5 min)             | treatment |
| 28 | Food deprivation (24 h)                                  | treatment |
| 29 | Physical restraint (activity restriction in bottle, 4 h) | treatment |
| 30 | Cold water swimming (15°C, 5 min)                        | treatment |
| 31 | Wet bedding (24 h)                                       | treatment |
| 32 | Water deprivation (23 h)/Empty water bottles (1 h)       | treatment |
| 33 | White noises (24 h)                                      | treatment |
| 34 | Day/night inversion (24 h)                               | treatment |
| 35 | Food deprivation (24 h)                                  | treatment |
| 36 | Tail pinch (1 cm apart from the tail, 5 min)             | treatment |
| 37 | Food deprivation (24 h)                                  | treatment |
| 38 | Physical restraint (activity restriction in bottle, 4 h) | treatment |
| 39 | Cold water swimming (15°C, 5 min)                        | treatment |
| 40 | Wet bedding (24 h)                                       | treatment |
| 41 | Water deprivation (23 h)/Empty water bottles (1 h)       | treatment |
| 42 | White noises (24 h)                                      | treatment |

---

**Table S2.** UHPLC–QTOF-MS data and assignments of the compounds in BR and VBBR samples

| No. | RT(min) | Identification               | Molecular formula                               | MW       | Measured value | [M-H] <sup>-</sup> theoretical exact mass | Tolerance (ppm) | MS/MS fragment ions                                                                                                                   | Source   |
|-----|---------|------------------------------|-------------------------------------------------|----------|----------------|-------------------------------------------|-----------------|---------------------------------------------------------------------------------------------------------------------------------------|----------|
| 1   | 4.358   | Hyperoside                   | C <sub>21</sub> H <sub>20</sub> O <sub>12</sub> | 464.0955 | 464.0989       | 463.0877                                  | 7.56            | 463.0912 [M-H] <sup>-</sup>                                                                                                           | BR, VBBR |
| 2   | 7.002   | Clinoposaponin XIV           | C <sub>42</sub> H <sub>68</sub> O <sub>14</sub> | 796.4609 | 796.4523       | 795.4529                                  | -1.13           | 795.4520 [M-H] <sup>-</sup>                                                                                                           | BR       |
| 3   | 7.124   | (-)-epinortrachelogenin      | C <sub>20</sub> H <sub>22</sub> O <sub>7</sub>  | 374.1366 | 374.1271       | 373.1287                                  | 9.65            | 373.1323 [M-H] <sup>-</sup><br>355.1195 [M-H-H <sub>2</sub> O] <sup>-</sup>                                                           | BR       |
| 4   | 8.199   | HOSSa                        | C <sub>42</sub> H <sub>70</sub> O <sub>14</sub> | 798.4766 | 798.4658       | 797.4687                                  | 4.01            | 797.4719 [M-H] <sup>-</sup><br>635.4030[M-H-Glc] <sup>-</sup>                                                                         | BR, VBBR |
| 5   | 8.775   | 3',4'-dimethoxy quercetin    | C <sub>18</sub> H <sub>34</sub> O <sub>5</sub>  | 330.0740 | 330.0718       | 329.0661                                  | -1.52           | 329.0656 [M-H] <sup>-</sup>                                                                                                           | BR, VBBR |
| 6   | 9.220   | Chinoposaponin XVIII         | C <sub>48</sub> H <sub>78</sub> O <sub>18</sub> | 942.5188 | 942.5212       | 941.5110                                  | -3.93           | 941.5073 [M-H] <sup>-</sup>                                                                                                           | BR, VBBR |
| 7   | 9.560   | 21β-hydroxy-SSb <sub>2</sub> | C <sub>48</sub> H <sub>68</sub> O <sub>14</sub> | 796.4609 | 796.4750       | 795.4472                                  | -3.65           | 795.4443 [M-H] <sup>-</sup><br>633.4103[M-H-Glc] <sup>-</sup>                                                                         | BR, VBBR |
| 8   | 9.900   | SSc                          | C <sub>48</sub> H <sub>78</sub> O <sub>17</sub> | 926.5239 | 926.5229       | 925.5161                                  | 5.08            | 925.5208 [M-H] <sup>-</sup><br>779.4444[M-H-Rha] <sup>-</sup><br>763.4682[M-H-Glc] <sup>-</sup><br>617.3965[M-H-Fuc-Glc] <sup>-</sup> | BR, VBBR |
| 9   | 9.986   | SSf                          | C <sub>48</sub> H <sub>80</sub> O <sub>17</sub> | 928.5396 | 928.5372       | 927.5317                                  | 2.16            | 927.5337[M-H] <sup>-</sup><br>781.4613[M-H-Rha] <sup>-</sup><br>765.4606[M-H-Glc] <sup>-</sup><br>619.4165[M-H-Fuc-Glc] <sup>-</sup>  | BR, VBBR |
| 10  | 10.817  | SSb <sub>3</sub>             | C <sub>43</sub> H <sub>72</sub> O <sub>14</sub> | 812.4922 | 812.4911       | 811.4844                                  | 5.18            | 811.4886[M-H] <sup>-</sup><br>649.4146[M-H-Glc] <sup>-</sup>                                                                          | BR, VBBR |
| 11  | 10.992  | SSb <sub>4</sub>             | C <sub>43</sub> H <sub>72</sub> O <sub>14</sub> | 812.4922 | 812.4928       | 811.4844                                  | 3.70            | 811.4874[M-H] <sup>-</sup>                                                                                                            | BR, VBBR |

|    |        |                                              |                                                 |          |          |          |       |                                                                                                                                                                                                                                           |          |
|----|--------|----------------------------------------------|-------------------------------------------------|----------|----------|----------|-------|-------------------------------------------------------------------------------------------------------------------------------------------------------------------------------------------------------------------------------------------|----------|
| 12 | 11.261 | Acetyl-SSb <sub>3</sub> or -SSb <sub>4</sub> | C <sub>45</sub> H <sub>74</sub> O <sub>15</sub> | 854.5028 | 854.4988 | 853.4949 | 0.82  | 649.4142[M-H-Glc] <sup>-</sup><br>853.4956[M-H] <sup>-</sup><br>811.4852[M-H-C <sub>2</sub> H <sub>2</sub> O] <sup>-</sup>                                                                                                                | BR       |
| 13 | 11.602 | SSa                                          | C <sub>42</sub> H <sub>68</sub> O <sub>13</sub> | 780.4660 | 780.4642 | 779.4582 | 3.46  | 779.4555[M-H] <sup>-</sup><br>617.4043[M-H-Glc] <sup>-</sup>                                                                                                                                                                              | BR, VBBR |
| 14 | 11.695 | SSb <sub>2</sub>                             | C <sub>42</sub> H <sub>68</sub> O <sub>13</sub> | 780.4660 | 780.4557 | 779.4582 | 5.52  | 779.4625[M-H] <sup>-</sup><br>617.3898[M-H-Glc] <sup>-</sup><br>541.3439[M-H-Glc-76] <sup>-</sup><br>471.2726[M-H-Fuc-Glc] <sup>-</sup>                                                                                                   | BR, VBBR |
| 15 | 12.282 | 2"-O-acetyl-SSa                              | C <sub>44</sub> H <sub>70</sub> O <sub>14</sub> | 822.4766 | 822.4741 | 821.4687 | 7.18  | 821.4746[M-H] <sup>-</sup><br>779.4615[M-H-C <sub>2</sub> H <sub>2</sub> O] <sup>-</sup><br>761.4412[M-H-C <sub>2</sub> H <sub>2</sub> O-H <sub>2</sub> O] <sup>-</sup><br>617.3954[M-H-C <sub>2</sub> H <sub>2</sub> O-Glc] <sup>-</sup> | BR, VBBR |
| 16 | 12.626 | SSb <sub>1</sub>                             | C <sub>42</sub> H <sub>68</sub> O <sub>13</sub> | 780.4660 | 780.4689 | 779.4582 | -8.85 | 779.4513[M-H] <sup>-</sup><br>617.4095[M-H-Glc] <sup>-</sup>                                                                                                                                                                              | BR, VBBR |
| 17 | 12.737 | 3"-O-acetyl-SSa                              | C <sub>44</sub> H <sub>70</sub> O <sub>14</sub> | 822.4766 | 822.4858 | 821.4687 | 7.55  | 821.4749[M-H] <sup>-</sup><br>779.4491[M-H-C <sub>2</sub> H <sub>2</sub> O] <sup>-</sup><br>761.3676[M-H-C <sub>2</sub> H <sub>2</sub> O-H <sub>2</sub> O] <sup>-</sup><br>617.3722[M-H-C <sub>2</sub> H <sub>2</sub> O-Glc] <sup>-</sup> | BR, VBBR |
| 18 | 12.963 | 2"-O-acetyl-SSb <sub>2</sub>                 | C <sub>44</sub> H <sub>70</sub> O <sub>14</sub> | 822.4766 | 822.4757 | 821.4687 | 6.45  | 821.4740[M-H] <sup>-</sup><br>779.4449[M-H-C <sub>2</sub> H <sub>2</sub> O] <sup>-</sup><br>761.3449[M-H-C <sub>2</sub> H <sub>2</sub> O-H <sub>2</sub> O] <sup>-</sup><br>617.4070[M-H-C <sub>2</sub> H <sub>2</sub> O-Glc] <sup>-</sup> | BR, VBBR |
| 19 | 13.141 | SSe                                          | C <sub>42</sub> H <sub>68</sub> O <sub>12</sub> | 764.4711 | 764.4659 | 763.4633 | 0.79  | 763.4639[M-H] <sup>-</sup><br>601.4020[M-H-Glc] <sup>-</sup>                                                                                                                                                                              | BR, VBBR |
| 20 | 13.643 | 4"-O-acetyl-SSa                              | C <sub>44</sub> H <sub>70</sub> O <sub>14</sub> | 822.4766 | 822.4759 | 821.4687 | 6.57  | 821.4741[M-H] <sup>-</sup>                                                                                                                                                                                                                | BR, VBBR |



|    |        |                           |                                                 |          |          |          |       |                                                                             |          |
|----|--------|---------------------------|-------------------------------------------------|----------|----------|----------|-------|-----------------------------------------------------------------------------|----------|
|    |        |                           |                                                 |          |          |          |       | 779.4526[M-H-C <sub>2</sub> H <sub>2</sub> O] <sup>-</sup>                  |          |
|    |        |                           |                                                 |          |          |          |       | 761.4424[M-H-C <sub>2</sub> H <sub>2</sub> O-H <sub>2</sub> O] <sup>-</sup> |          |
|    |        |                           |                                                 |          |          |          |       | 617.3922[M-H-C <sub>2</sub> H <sub>2</sub> O-Glc] <sup>-</sup>              |          |
|    |        |                           |                                                 |          |          |          |       | 541.9836[M-H-Glc-76] <sup>-</sup>                                           |          |
| 21 | 14.324 | Acetyl-SSm                | C <sub>44</sub> H <sub>70</sub> O <sub>13</sub> | 806.4816 | 806.4758 | 805.4738 | 0     | 805.4738[M-H] <sup>-</sup>                                                  | BR, VBBR |
|    |        |                           |                                                 |          |          |          |       | 763.4640[M-H-C <sub>2</sub> H <sub>2</sub> O] <sup>-</sup>                  |          |
|    |        |                           |                                                 |          |          |          |       | 745.4531[M-H-C <sub>2</sub> H <sub>2</sub> O-H <sub>2</sub> O] <sup>-</sup> |          |
| 22 | 14.488 | SSd                       | C <sub>42</sub> H <sub>68</sub> O <sub>13</sub> | 780.4660 | 780.4645 | 779.4582 | -1.80 | 601.4105[M-H-C <sub>2</sub> H <sub>2</sub> O-Glc] <sup>-</sup>              | BR, VBBR |
|    |        |                           |                                                 |          |          |          |       | 779.4568[M-H] <sup>-</sup>                                                  |          |
|    |        |                           |                                                 |          |          |          |       | 617.3663[M-H-Glc] <sup>-</sup>                                              |          |
| 23 | 14.893 | 2"-O-acetyl-SSd           | C <sub>44</sub> H <sub>70</sub> O <sub>14</sub> | 822.4766 | 822.4752 | 821.4687 | 0.37  | 821.4690[M-H] <sup>-</sup>                                                  | BR, VBBR |
|    |        |                           |                                                 |          |          |          |       | 779.4592[M-H-C <sub>2</sub> H <sub>2</sub> O] <sup>-</sup>                  |          |
|    |        |                           |                                                 |          |          |          |       | 761.4507[M-H-C <sub>2</sub> H <sub>2</sub> O-H <sub>2</sub> O] <sup>-</sup> |          |
| 24 | 15.345 | Diacetyl-SSb <sub>2</sub> | C <sub>46</sub> H <sub>72</sub> O <sub>15</sub> | 864.4871 | 864.4859 | 863.4793 | -7.53 | 617.4232[M-H-C <sub>2</sub> H <sub>2</sub> O-Glc] <sup>-</sup>              | BR, VBBR |
| 25 | 15.384 | 3"-O-acetyl-SSd           | C <sub>44</sub> H <sub>70</sub> O <sub>14</sub> | 822.4766 | 822.4752 | 821.4687 | 9.86  | 863.4728[M-H] <sup>-</sup>                                                  | BR, VBBR |
|    |        |                           |                                                 |          |          |          |       | 821.4768[M-H] <sup>-</sup>                                                  |          |
|    |        |                           |                                                 |          |          |          |       | 779.4572[M-H-C <sub>2</sub> H <sub>2</sub> O] <sup>-</sup>                  |          |
|    |        |                           |                                                 |          |          |          |       | 761.4506[M-H-C <sub>2</sub> H <sub>2</sub> O-H <sub>2</sub> O] <sup>-</sup> |          |
| 26 | 16.025 | 4"-O-acetyl-SSd           | C <sub>44</sub> H <sub>70</sub> O <sub>14</sub> | 822.4766 | 822.4763 | 821.4687 | 4.87  | 617.4125[M-H-C <sub>2</sub> H <sub>2</sub> O-Glc] <sup>-</sup>              | BR, VBBR |
|    |        |                           |                                                 |          |          |          |       | 821.4727[M-H] <sup>-</sup>                                                  |          |
|    |        |                           |                                                 |          |          |          |       | 779.4723[M-H-C <sub>2</sub> H <sub>2</sub> O] <sup>-</sup>                  |          |
|    |        |                           |                                                 |          |          |          |       | 761.4377[M-H-C <sub>2</sub> H <sub>2</sub> O-H <sub>2</sub> O] <sup>-</sup> |          |
| 27 | 16.297 | 6"-O-acetyl-SSd           | C <sub>44</sub> H <sub>70</sub> O <sub>14</sub> | 822.4766 | 822.4768 | 821.4687 | 3.65  | 617.4034[M-H-C <sub>2</sub> H <sub>2</sub> O-Glc] <sup>-</sup>              | BR, VBBR |
|    |        |                           |                                                 |          |          |          |       | 821.4717[M-H] <sup>-</sup>                                                  |          |
|    |        |                           |                                                 |          |          |          |       | 779.4604[M-H-C <sub>2</sub> H <sub>2</sub> O] <sup>-</sup>                  |          |
|    |        |                           |                                                 |          |          |          |       | 617.4078[M-H-C <sub>2</sub> H <sub>2</sub> O-Glc] <sup>-</sup>              |          |

|    |        |              |                      |          |          |          |       |                                                                                                                                                                                                                                                         |          |
|----|--------|--------------|----------------------|----------|----------|----------|-------|---------------------------------------------------------------------------------------------------------------------------------------------------------------------------------------------------------------------------------------------------------|----------|
| 28 | 16.515 | Diacetyl-SSd | $C_{46}H_{72}O_{15}$ | 864.4871 | 864.4841 | 863.4793 | -6.14 | 863.4740[M-H] <sup>-</sup><br>821.4637[M-H-C <sub>2</sub> H <sub>2</sub> O] <sup>-</sup><br>803.4763[M-H-C <sub>2</sub> H <sub>2</sub> O-H <sub>2</sub> O] <sup>-</sup><br>761.3729[M-H-2C <sub>2</sub> H <sub>2</sub> O-H <sub>2</sub> O] <sup>-</sup> | BR, VBBR |
| 29 | 16.849 | Diacetyl-SSd | $C_{46}H_{72}O_{15}$ | 864.4871 | 864.4843 | 863.4793 | -5.91 | 863.4742[M-H] <sup>-</sup><br>821.4572[M-H-C <sub>2</sub> H <sub>2</sub> O] <sup>-</sup><br>803.3924[M-H-C <sub>2</sub> H <sub>2</sub> O-H <sub>2</sub> O] <sup>-</sup><br>761.4001[M-H-2C <sub>2</sub> H <sub>2</sub> O-H <sub>2</sub> O] <sup>-</sup> | BR       |
| 30 | 17.310 | Diacetyl-SSd | $C_{46}H_{72}O_{15}$ | 864.4871 | 864.4850 | 863.4793 | 5.79  | 863.4843[M-H] <sup>-</sup><br>821.4383[M-H-C <sub>2</sub> H <sub>2</sub> O] <sup>-</sup>                                                                                                                                                                | BR       |

**Table S3(a).** <sup>1</sup>H NMR data and assignments of the metabolites in hippocampus samples.

| No. | Metabolites                 | Moieties                                                     | $\delta^1\text{H/ppm}$ and multiplicity |
|-----|-----------------------------|--------------------------------------------------------------|-----------------------------------------|
| 1   | Lipids                      | CH <sub>3</sub> , (CH <sub>2</sub> ) <sub>n</sub>            | 0.90(m)                                 |
| 2   | Leucine                     | $\delta\text{CH}_3$ , $\alpha\text{CH}$ , $\alpha\text{CH}$  | 0.98(d), 3.73(m), 1.70(m)               |
| 3   | Isoleucine                  | $\delta\text{CH}_3$ , $\gamma\text{CH}_3$                    | 1.01(d), 0.95(m)                        |
| 4   | Valine                      | $\gamma'\text{CH}_3$ , $\gamma\text{CH}_3$                   | 0.99(d), 1.05(d)                        |
| 5   | Lactate                     | $\beta\text{CH}_3$ , $\alpha\text{CH}$                       | 1.33(d), 4.12(q)                        |
| 6   | Alanine                     | $\beta\text{CH}_3$ , -CH-                                    | 1.48(d), 3.73(m)                        |
| 7   | Arginine                    | $\gamma\text{CH}_2$                                          | 1.73(m)                                 |
| 8   | Acetate                     | CH <sub>3</sub>                                              | 1.92(s)                                 |
| 9   | $\gamma$ -Aminobutyric acid | CH <sub>3</sub> , CH <sub>2</sub> , -CH-                     | 1.91(m), 2.30(t), 3.02(m)               |
| 10  | Glutamate                   | $\alpha\text{CH}$ , $\beta\text{CH}_2$ , $\gamma\text{CH}_2$ | 2.05(m), 2.36(m), 3.77(m)               |
| 11  | Glutamine                   | CH <sub>2</sub>                                              | 2.14(m)                                 |
| 12  | Acetoacetate                | COCH <sub>3</sub>                                            | 2.29(s)                                 |
| 13  | Succinate                   | $\alpha\text{CH}_2$                                          | 2.36(s)                                 |
| 14  | Citrate                     | Half CH <sub>2</sub> , Half CH <sub>2</sub>                  | 2.50(d), 2.66(d)                        |
| 15  | Sarcosine                   | CH <sub>3</sub> , CH <sub>2</sub>                            | 2.70(s), 3.60(s)                        |
| 16  | Dimethylglycine             | CH <sub>3</sub>                                              | 3.01(s)                                 |
| 17  | 2-Oxoglutarate              | CH <sub>2</sub>                                              | 3.03(m), 2.42(m)                        |
| 18  | Creatine                    | N-CH <sub>3</sub> , N-CH <sub>2</sub> -                      | 3.02(s), 3.94(s)                        |
| 19  | Creatinine                  | N-CH <sub>3</sub> , N-CH <sub>2</sub> -                      | 3.04(s), 4.07(s)                        |
| 20  | Choline                     | N(CH <sub>3</sub> ) <sub>3</sub> , OCH <sub>2</sub>          | 3.21(s), 4.05(m)                        |
| 21  | Phosphatidylcholine         | N(CH <sub>3</sub> ) <sub>3</sub>                             | 3.22(s)                                 |
| 22  | Glycerophosphocholine       | N(CH <sub>3</sub> ) <sub>3</sub>                             | 3.23(s)                                 |
| 23  | Taurine                     | S-CH <sub>2</sub> , N-CH <sub>2</sub>                        | 3.27(t), 3.43(t)                        |
| 24  | TMAO                        | CH <sub>3</sub>                                              | 3.27(s)                                 |
| 25  | Betaine                     | CH <sub>2</sub> , CH <sub>3</sub>                            | 3.27(s), 3.89(s)                        |
| 26  | Threonine                   | $\gamma\text{CH}_2$                                          | 4.27(m), 3.58(d)                        |
| 27  | Myo-inositol                | CH <sub>2</sub> , CH                                         | 3.29(t), 3.54(dd), 3.62(m)              |
| 28  | Aspartate                   | $\beta\text{CH}_2$ , $\alpha\text{CH}$                       | 2.68(dd), 2.82(dd)                      |
| 29  | Glycine                     | CH <sub>2</sub>                                              | 3.55(s)                                 |
| 30  | Glycerol                    | CH <sub>2</sub> , CH                                         | 3.57(m), 3.79(m)                        |
| 31  | $\beta$ -glucose            | 1-CH                                                         | 4.65(d)                                 |
| 32  | Fumarate                    | CH=                                                          | 6.52(s)                                 |
| 33  | Tyrosine                    | 1-CH                                                         | 6.90(d), 7.20(d)                        |
| 34  | Histidine                   | 5-CH, 2-CH                                                   | 7.11(s), 7.90(s)                        |
| 35  | Phenylalanine               | 2,6-CH, 3,5-CH, 4-CH                                         | 7.33(d), 7.38(t), 7.43(t)               |
| 36  | Uracil                      | $\alpha$ -CH, $\beta$ -CH                                    | 7.54(d), 5.81(d)                        |
| 37  | Xanthurenate                | -CH=N                                                        | 7.90(s)                                 |

<sup>a</sup> Multiplicity for <sup>1</sup>H resonances: s, single; d, doublet; t, triplet; q, quartet; m, multiplet; dd, doublet of doublets.

**Table S3 (b).** <sup>1</sup>H NMR data and assignments of the metabolites in liver samples.

| No. | Metabolites              | Moieties                                                     | $\delta^1\text{H/ppm}$ and multiplicity |
|-----|--------------------------|--------------------------------------------------------------|-----------------------------------------|
| 1   | Lipids                   | CH <sub>3</sub> , (CH <sub>2</sub> ) <sub>n</sub>            | 0.90(m)                                 |
| 2   | Leucine                  | $\delta\text{CH}_3$ , $\alpha\text{CH}$ , $\alpha\text{CH}$  | 0.98(d), 3.73(m), 1.70(m)               |
| 3   | Isoleucine               | $\delta\text{CH}_3$ , $\gamma\text{CH}_3$                    | 1.02(d), 0.95(m)                        |
| 4   | Valine                   | $\gamma'\text{CH}_3$ , $\gamma\text{CH}_3$                   | 0.99(d), 1.05(d)                        |
| 5   | $\beta$ -hydroxybutyrate | CH <sub>3</sub> , CH <sub>2</sub> , -CH-                     | 1.21(d), 2.41(d), 2.31(d)               |
| 6   | Lactate                  | $\beta\text{CH}_3$ , $\alpha\text{CH}$                       | 1.33(d), 4.12(q)                        |
| 7   | Alanine                  | $\beta\text{CH}_3$ , -CH-                                    | 1.49(d), 3.73(m)                        |
| 8   | Arginine                 | $\gamma\text{CH}_2$                                          | 1.73(m)                                 |
| 9   | Acetate                  | CH <sub>3</sub>                                              | 1.93(s)                                 |
| 10  | Glutamate                | $\alpha\text{CH}$ , $\beta\text{CH}_2$ , $\gamma\text{CH}_2$ | 2.07(m), 2.36(m), 3.73(m)               |
| 11  | Glutathione              | CH <sub>2</sub> , CH <sub>2</sub>                            | 2.12(m), 2.56(m)                        |
| 12  | Methionine               | S-CH <sub>3</sub>                                            | 2.14(s)                                 |
| 13  | Succinate                | $\alpha\text{CH}_2$                                          | 2.37(s)                                 |
| 14  | Pyruvate                 | CH <sub>3</sub>                                              | 2.41(s)                                 |
| 15  | Dimethylamine            | CH <sub>3</sub>                                              | 2.73(s)                                 |
| 16  | Dimethylglycine          | CH <sub>3</sub>                                              | 3.01(s)                                 |
| 17  | Creatine                 | N-CH <sub>3</sub> , N-CH <sub>2</sub> -                      | 3.02(s), 3.94(s)                        |
| 18  | 2-Oxoglutarate           | CH <sub>2</sub>                                              | 3.03(m), 2.43(m)                        |
| 19  | O-Acetylcarnitine        | NCH <sub>3</sub>                                             | 3.19(s)                                 |
| 20  | Choline                  | N(CH <sub>3</sub> ) <sub>3</sub> , OCH <sub>2</sub>          | 3.21(s), 4.05(m)                        |
| 21  | Glycerophosphocholine    | N(CH <sub>3</sub> ) <sub>3</sub>                             | 3.23(s)                                 |
| 22  | phosphoethanolamine      | NCH <sub>3</sub> , CH <sub>2</sub>                           | 3.23(t), 3.89(m)                        |
| 23  | Taurine                  | S-CH <sub>2</sub> , N-CH <sub>2</sub>                        | 3.27(t), 3.41(t)                        |
| 24  | TMAO                     | CH <sub>3</sub>                                              | 3.27(s)                                 |
| 25  | Betaine                  | CH <sub>2</sub> , CH <sub>3</sub>                            | 3.27(s), 3.89(s)                        |
| 26  | Scyllo-inositol          | CH <sub>3</sub>                                              | 3.37(s)                                 |
| 27  | Aspartate                | $\beta\text{CH}_2$ , $\alpha\text{CH}$                       | 2.70(dd), 2.82(dd)                      |
| 28  | Glycine                  | CH <sub>2</sub>                                              | 3.55(s)                                 |
| 29  | Glycerol                 | CH <sub>2</sub> , CH                                         | 3.58(m), 3.78(m)                        |
| 30  | Oxidized glutathione     | CH <sub>2</sub> , CH <sub>3</sub>                            | 3.79(t), 2.57(m)                        |
| 31  | $\beta$ -glucose         | 1-CH                                                         | 4.65(d)                                 |
| 32  | $\alpha$ -glucose        | 1-CH                                                         | 5.24(d)                                 |
| 33  | Tyrosine                 | CH                                                           | 6.90(d), 7.20(d)                        |
| 34  | Histidine                | $\beta\text{CH}_2$ , CH <sub>2</sub>                         | 7.11(s), 3.15(dd)                       |
| 35  | Phenylalanine            | 2,6-CH, 3,5-CH,4-CH                                          | 7.34(d), 7.38(m), 7.44(m)               |
| 36  | Phenylacetylglutamine    | -CH=, CH=, -CH <sub>2</sub> , -CH                            | 7.42(s), 7.39(m), 3.68(s), 3.77(d)      |
| 37  | Uracil                   | $\alpha$ -CH, $\beta$ -CH                                    | 7.54(d), 5.81(d)                        |
| 38  | Xanthurenate             | -CH=N                                                        | 7.91(s)                                 |

<sup>a</sup> Multiplicity for <sup>1</sup>H resonances: s, single; d, doublet; t, triplet; q, quartet; m, multiplet; dd, doublet of doublets.

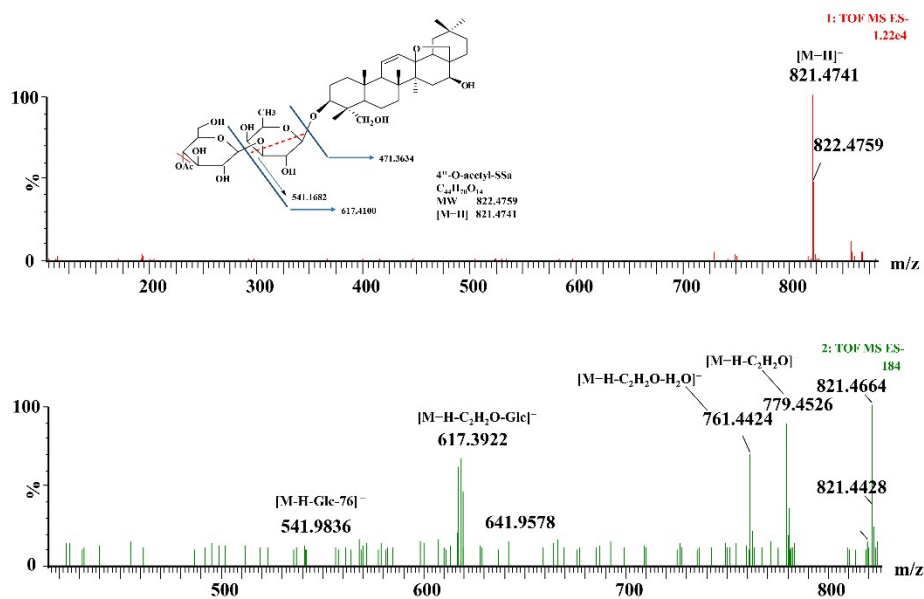

**Fig. S1** ESI-QTOF-MS/MS spectra and possible fragment pathway of 4''-O-acetyl-SSa in negative mode, (A) MS of ion at  $m/z$  821, (B) MS2 of ion at  $m/z$  617.

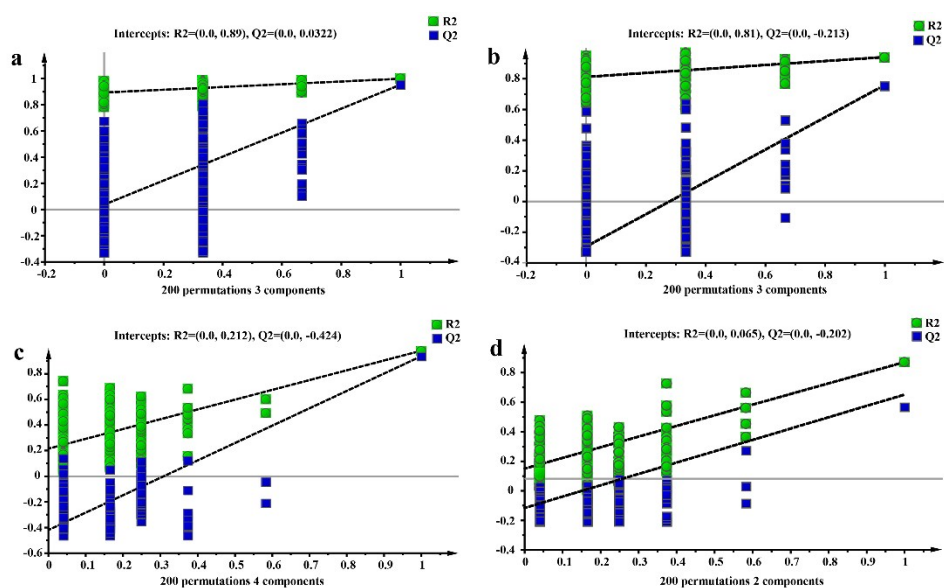

**Fig. S2** PLS-DA model validation based on <sup>1</sup>H NMR data of hippocampus and liver. a, b represents data of hippocampus and liver for the CUMS group (MS) and the control group (NS); c, d represents data of hippocampus and liver for the CUMS group (MS), the control group (NS), Bupleuri Radix (BR), vinegar-baked Bupleuri Radix (VBBR) and FLU group (FLU).
